# Supplementary material
Source: PubMed Central journal article supplement (PMC8119135)
Supplement: A1092.pdf [file A1092.pdf]

**On-line Table 1: Imaging and surgical records of the series of carotid body tumors (n = 9)**

| No. | Location         | CC Extent, cm | Axial Size, cm <sup>2</sup> | Volume, mL | Distance from Skull Base to Tumor, cm | Maximum Degree of Contact of ICA (A1), ECA (A2), and CCA (A3) | MR Image Type | Surgical Details                                                                                          |
|-----|------------------|---------------|-----------------------------|------------|---------------------------------------|---------------------------------------------------------------|---------------|-----------------------------------------------------------------------------------------------------------|
| 1   | Right unilateral | 5.3           | 4.7 × 3.5                   | 43.6       | 2.6                                   | A1 = 360<br>A2 = 360<br>A3 = 255                              | Type III      | Shamblin III<br>ECA, ICA, and distal CCA sacrificed<br>Vessel anastomosis using graft<br>Nerves preserved |
| 2   | Left unilateral  | 3.6           | 3.2 × 3.5                   | 20         | 3.0                                   | A1 = 280<br>A2 = 285<br>A3 = 140                              | Type III      | Shamblin III<br>ICA and ECA sacrificed<br>ICA reconstruction with graft<br>Nerves preserved               |
| 3   | Left unilateral  | 4.9           | 3.2 × 2.0                   | 15.7       | 3.0                                   | A1 = 360<br>A2 = 270<br>A3 = 280                              | Type III      | Shamblin III<br>ICA sacrificed and reconstructed with graft<br>ECA ligated                                |
| 4   | Left unilateral  | 3.4           | 3.3 × 2.5                   | 14.0       | 2.8                                   | A1 = 360<br>A2 = 180                                          | Type III      | Shamblin III<br>ICA sacrificed and reconstructed with graft<br>ECA preserved                              |
| 5   | Right bilateral  | 10.3          | 7.0 × 5.0                   | 180.0      | 1.6                                   | A1 = 360<br>A2 = 360<br>A3 = 190                              | Type III      | Shamblin III<br>Distal part of tumor excised; ICA and ECA preserved and inseparable from residual tumor   |
| 6   | Left bilateral   | 8.2           | 2.8 × 2.1                   | 24.0       | 4.2                                   | A1 = 210<br>A2 = 230                                          | Type II       | Not operated (surgery on contralateral tumor)                                                             |
| 7   | Left unilateral  | 3.4           | 3.0 × 3.1                   | 15.8       | 4.8                                   | A1 = 150<br>A2 = 180                                          | Type I        | Shamblin I<br>ICA and ECA preserved<br>Nerves preserved                                                   |
| 8   | Right unilateral | 2.3           | 6.3 × 3.7                   | 26.8       | 3.0                                   | A1 = 210<br>A2 = 260<br>A3 = 210                              | Type II       | Shamblin II<br>ICA preserved<br>ECA ligated<br>Nerves preserved                                           |
| 9   | Right unilateral | 5.0           | 3.0 × 3.0                   | 22.5       | 5.5                                   | A1 = 210<br>A2 = 240                                          | Type II       | Shamblin II<br>ICA and ECA preserved<br>Nerves preserved<br>Rent in ICA sutured                           |

**Note:**—ICA indicates internal carotid artery; CCA, common carotid artery; ECA, external carotid artery; CC, craniocaudal.
